# Supplementary material for: Machine Learning Gene Signature to Metastatic ccRCC Based on ceRNA Network
Source: MDPI journal article supplement (doi:10.3390/ijms25084214), 2024-04-11
Supplement: s1 [file s1]

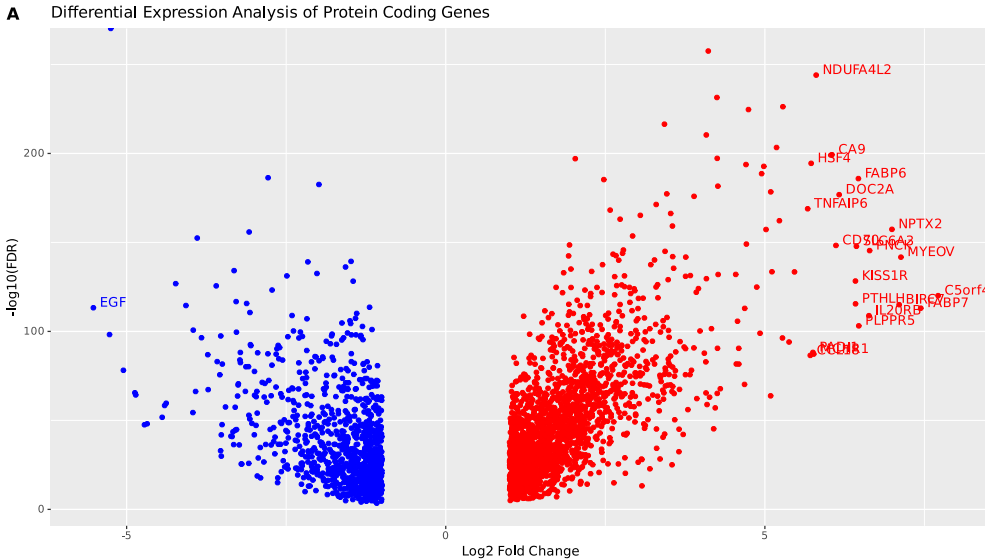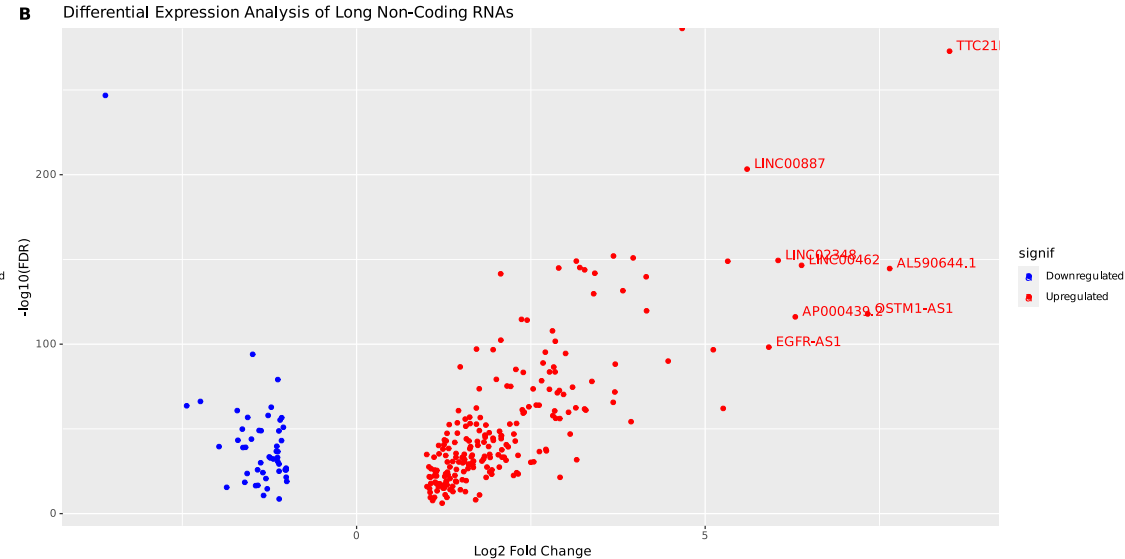

**Figure S1:** Volcano plots for the differentially expressed genes. Volcano plot **A** on top left represents the proteing coding genes differentially expressed, volcano **B** on the top right represents the long non-coding genes differentially expressed. The red genes are upregulated and the blue genes are downregulated. The highlighted are the overexpressed or downexpressed, with a  $|\log_2FC| > 5$  for teh protein and long non- coding genes.
