# Supplementary material for: Machine Learning Gene Signature to Metastatic ccRCC Based on ceRNA Network
Source: MDPI journal article supplement (doi:10.3390/ijms25084214), 2024-04-11
Supplement: s1 [file s1]

Table S1: Feature selection techniques and application stage.

| Method  | Technique                     | Step                               |
|---------|-------------------------------|------------------------------------|
| Filter  | Generalized Linear Model      | Feature Selection and Benchmarking |
|         | Linear Discriminant Analysis  | Feature Selection                  |
|         | Akaike Information Criterion  | Feature Selection                  |
|         | eXtreme Gradient Boosting     | Benchmarking and Validation        |
| Wrapper | Boruta                        | Feature Selection                  |
|         | Recursive Feature Elimination | Feature Selection                  |
|         | Lasso                         | Feature Selection                  |
|         | ElasticNet                    | Feature Selection                  |
|         | Support Vector Machine        | Benchmarking and Validation        |
|         | Naive Bayes                   | Validation                         |
|         | k-Nearest Neighbors           | Validation                         |
|         | Random Forest                 | Benchmarking and Validation        |

Table S2: Gene-signature chromosomal location

| Gene            | Chromosomal Location |
|-----------------|----------------------|
| AF117829.1      | 8q21.3               |
| BTBD11          | 12q23.3              |
| HECW2           | 2q23.3               |
| HMMR            | 5q34                 |
| hsa-miR-130a-3p | 11q12.1              |
| hsa-miR-381-3p  | 14q32.31             |
| INSR            | 19p13.2              |
| RASD1           | 17p11.2              |
| PTTG1           | 5q33.3               |
| RFLNB           | 17p13.3              |
| SNHG15          | 7p13                 |
