# Supplementary material for: Machine Learning Gene Signature to Metastatic ccRCC Based on ceRNA Network
Source: MDPI journal article supplement (doi:10.3390/ijms25084214), 2024-04-11
Supplement: s1 [file s1]

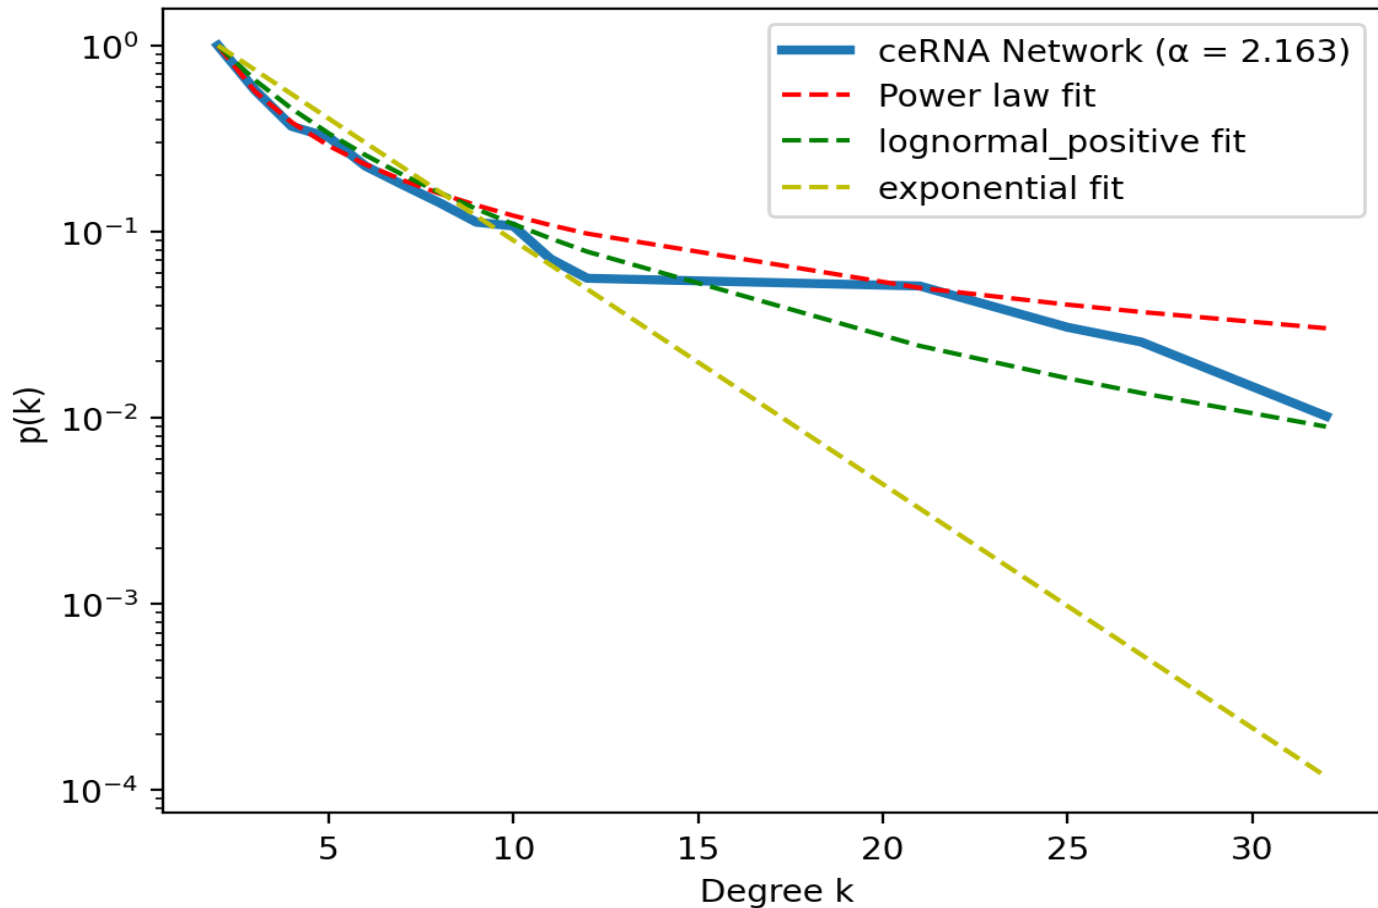

**Figure S2:** Evaluating the ceRNA network distribution, comparing with the power-law distribution (red dashed line), log-normal distribution (green dashed line), and exponential distribution (yellow dashed line).
