# Supplementary material for: Machine Learning Gene Signature to Metastatic ccRCC Based on ceRNA Network
Source: MDPI journal article supplement (doi:10.3390/ijms25084214), 2024-04-11
Supplement: s1 [file s1]

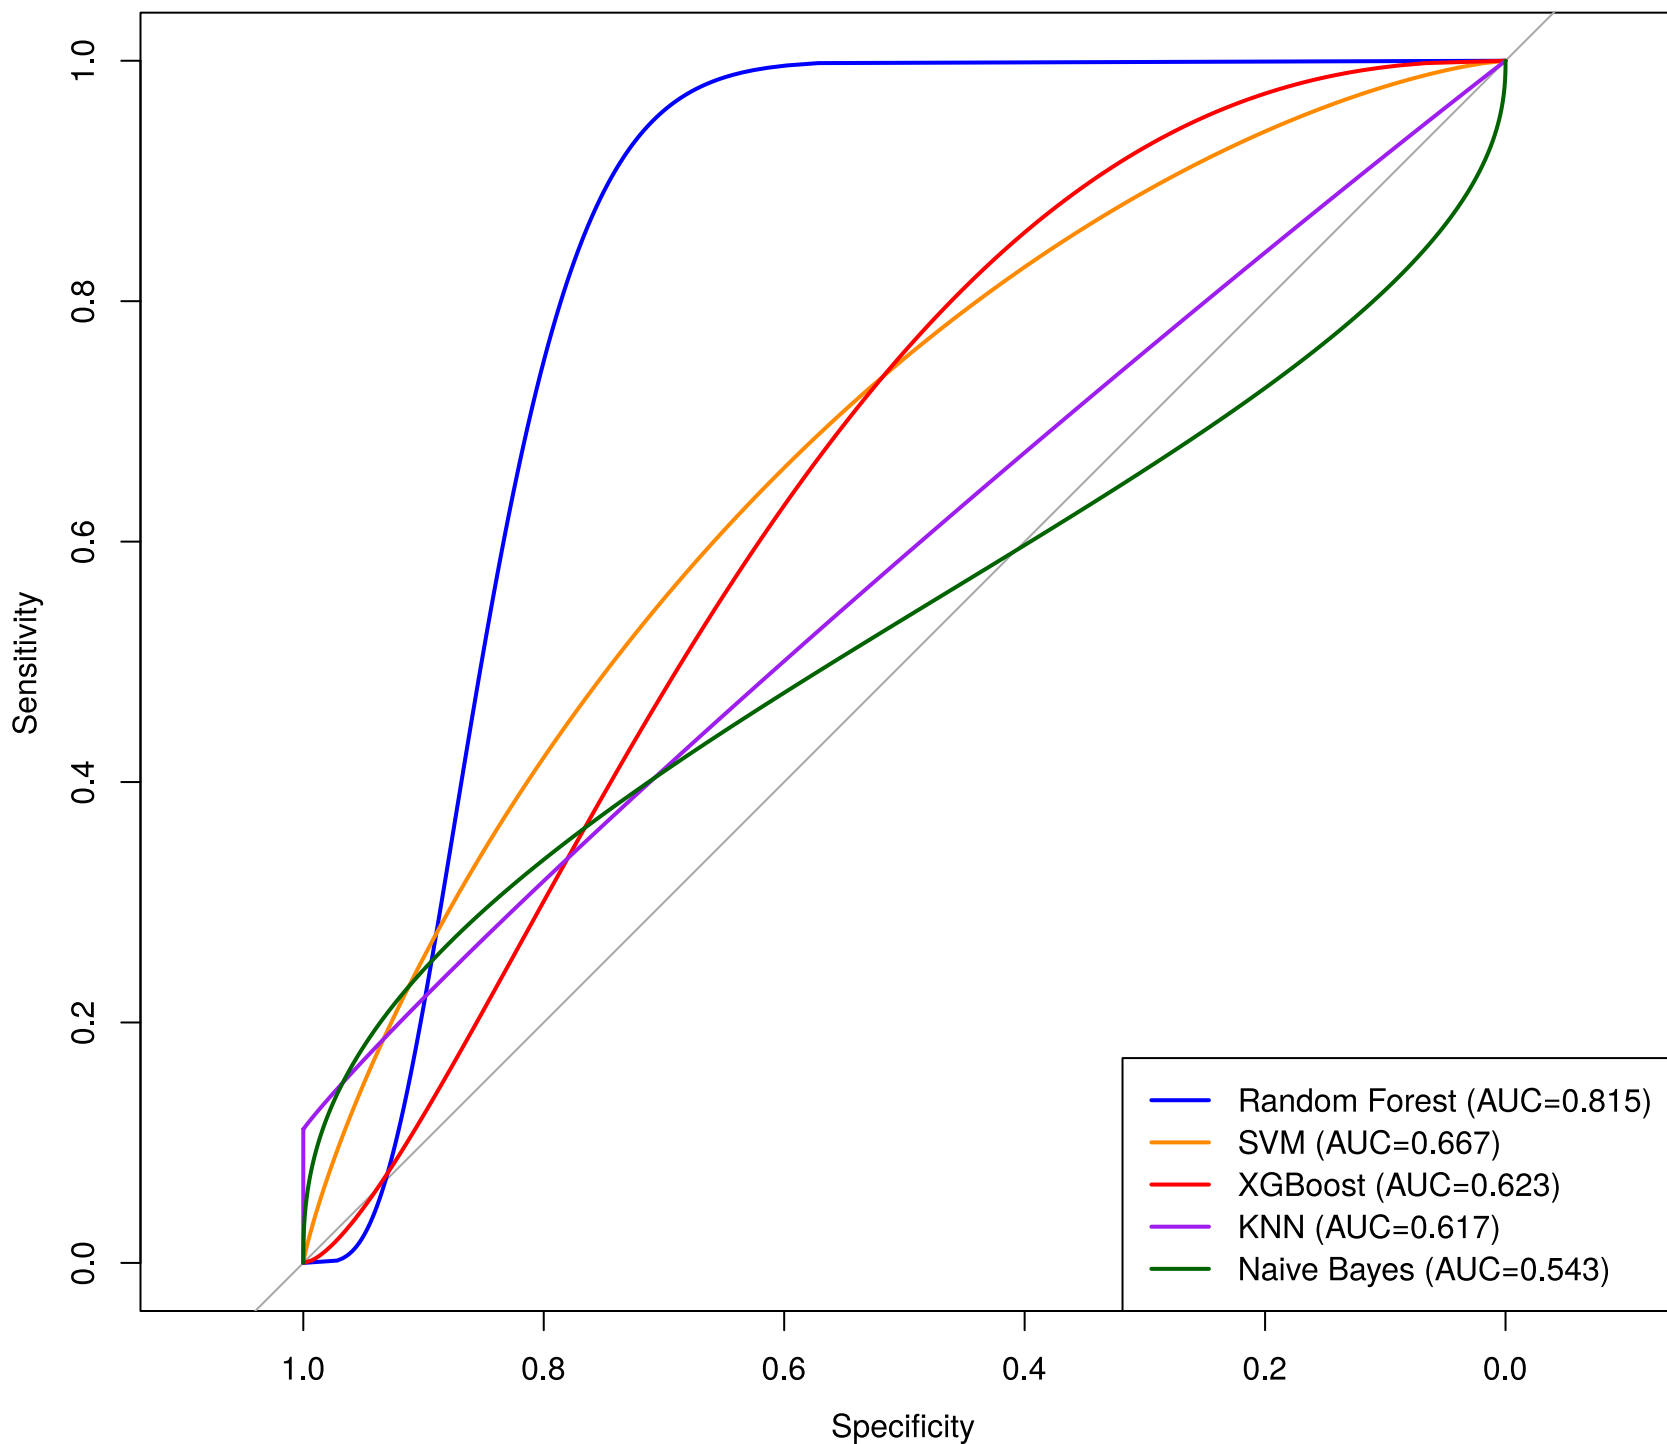

**Figure S3:** Plot presenting the AUC of the validation process. Where we see a better classification performed by the Random Forest method, with an value of 81.5 %
