# Supplementary material for: Machine Learning Gene Signature to Metastatic ccRCC Based on ceRNA Network
Source: MDPI journal article supplement (doi:10.3390/ijms25084214), 2024-04-11
Supplement: s1 [file s1]

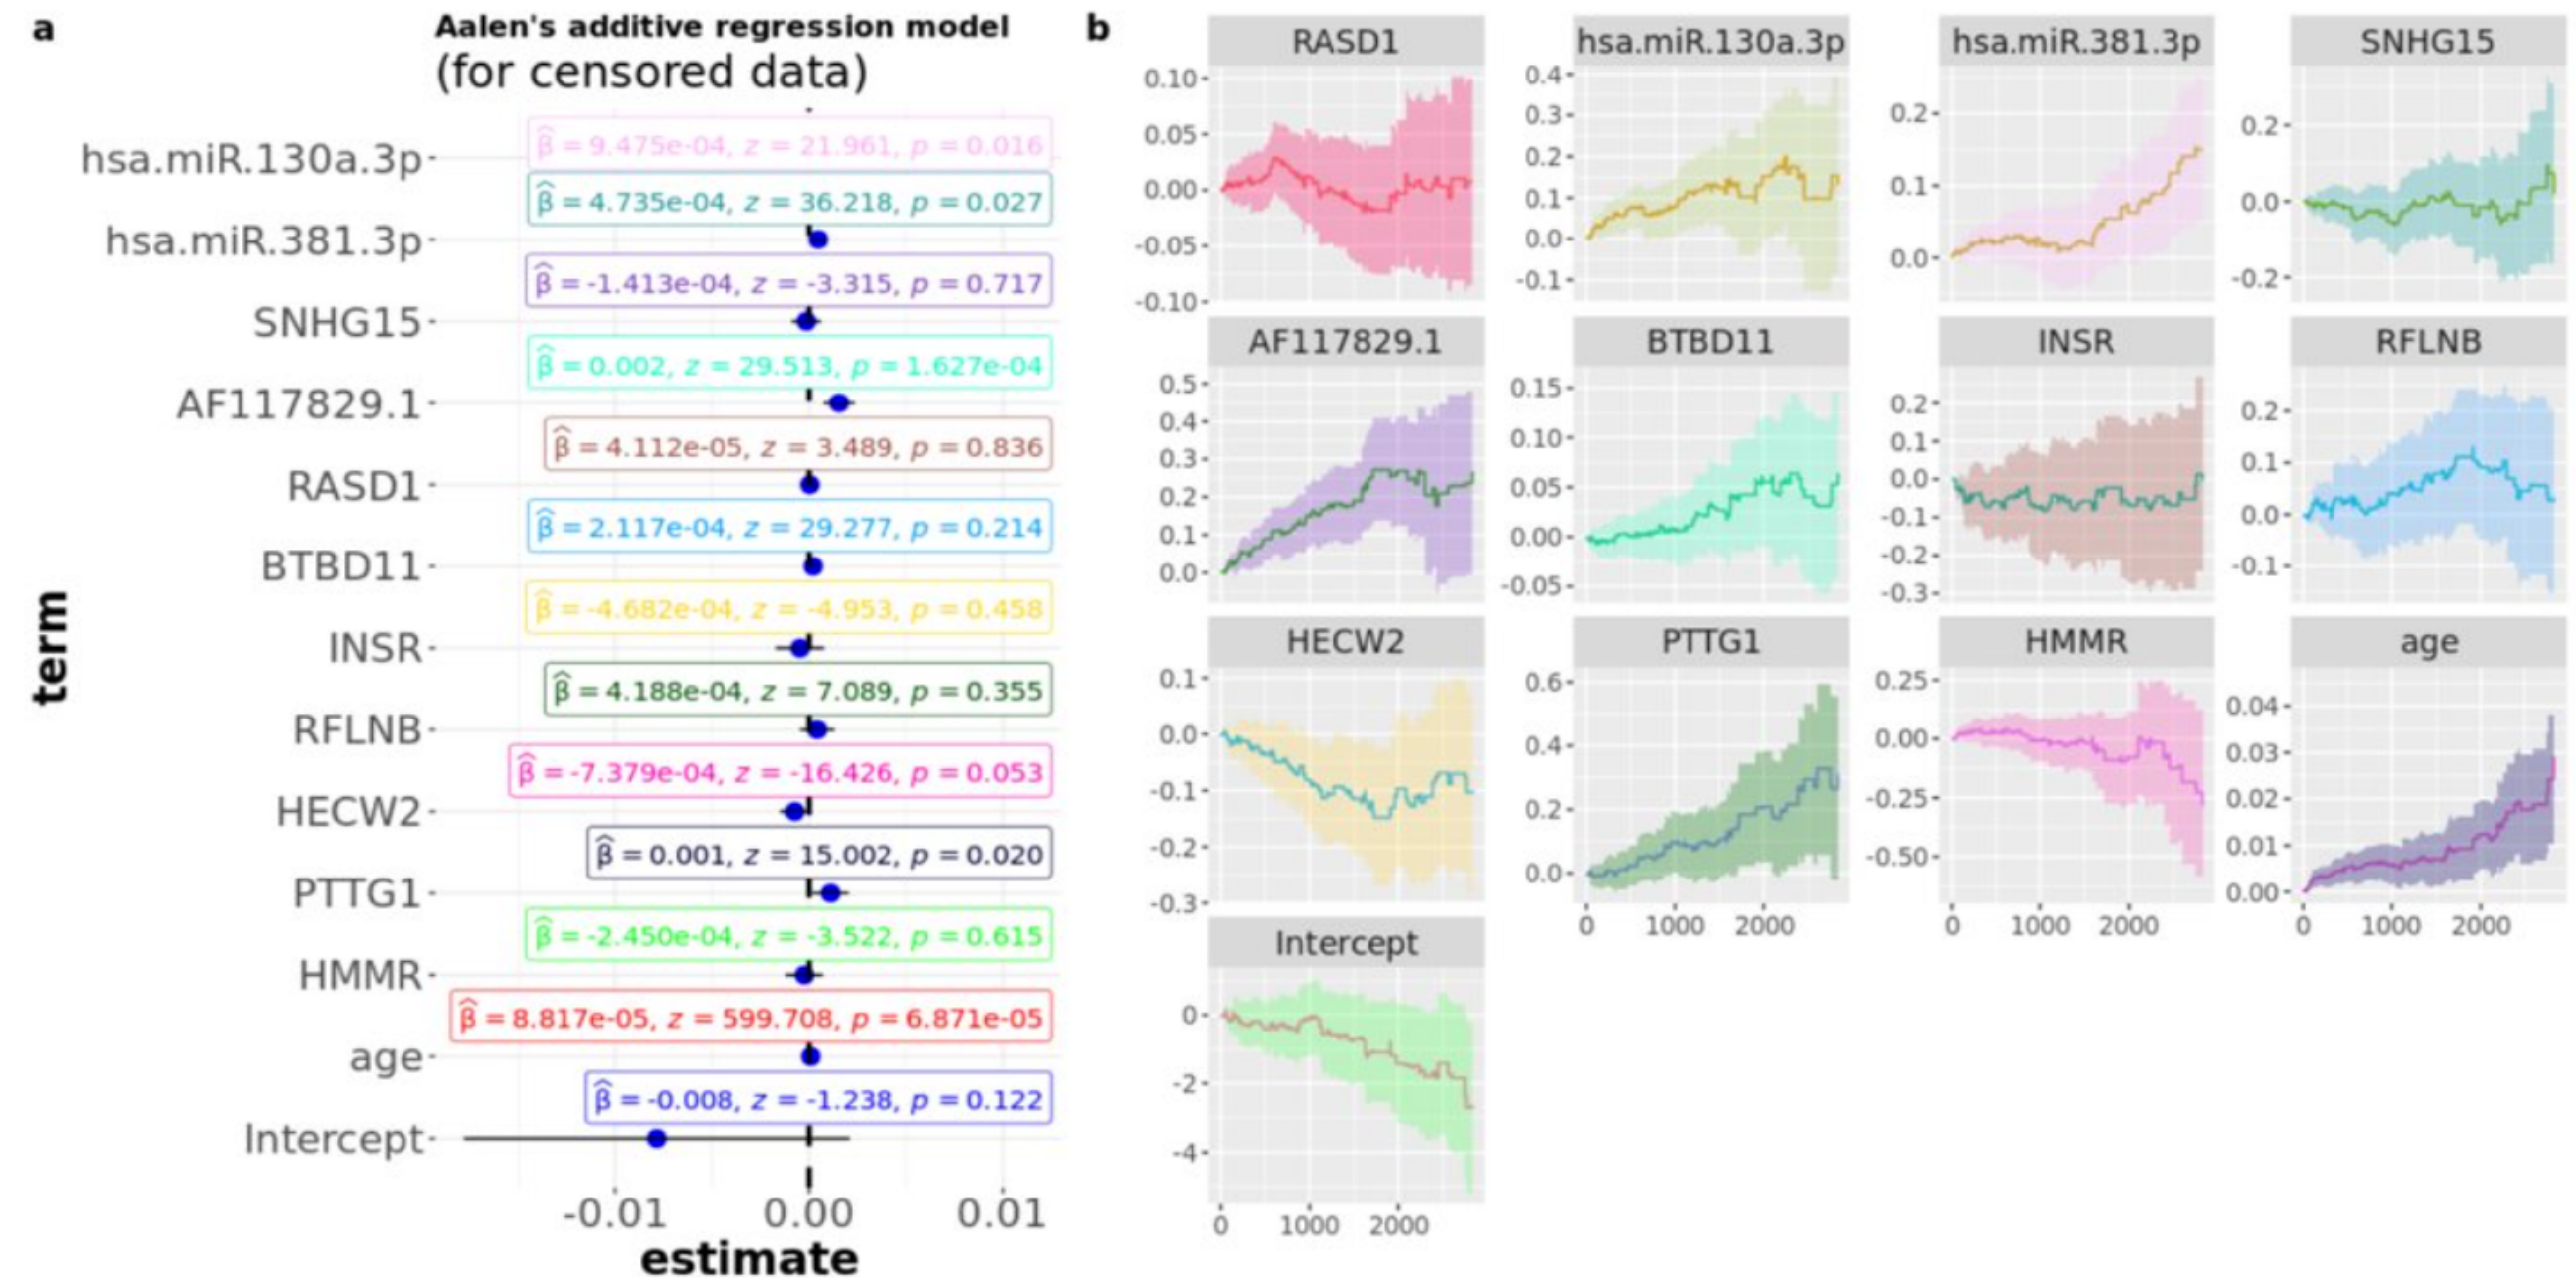

**Figure S7:**Time-Dependent Hazard Assessment and Covariate Effects. Figure **S7A** represents the covariates coefficients and their p-value associated, and figure **S7B** represents the Hazard Ratio curve, indicating the covariates behavior through time.
