# Supplementary material for: Machine Learning Gene Signature to Metastatic ccRCC Based on ceRNA Network
Source: MDPI journal article supplement (doi:10.3390/ijms25084214), 2024-04-11
Supplement: s1 [file s1]

Altered in 10 (2.49%) of 402 samples.

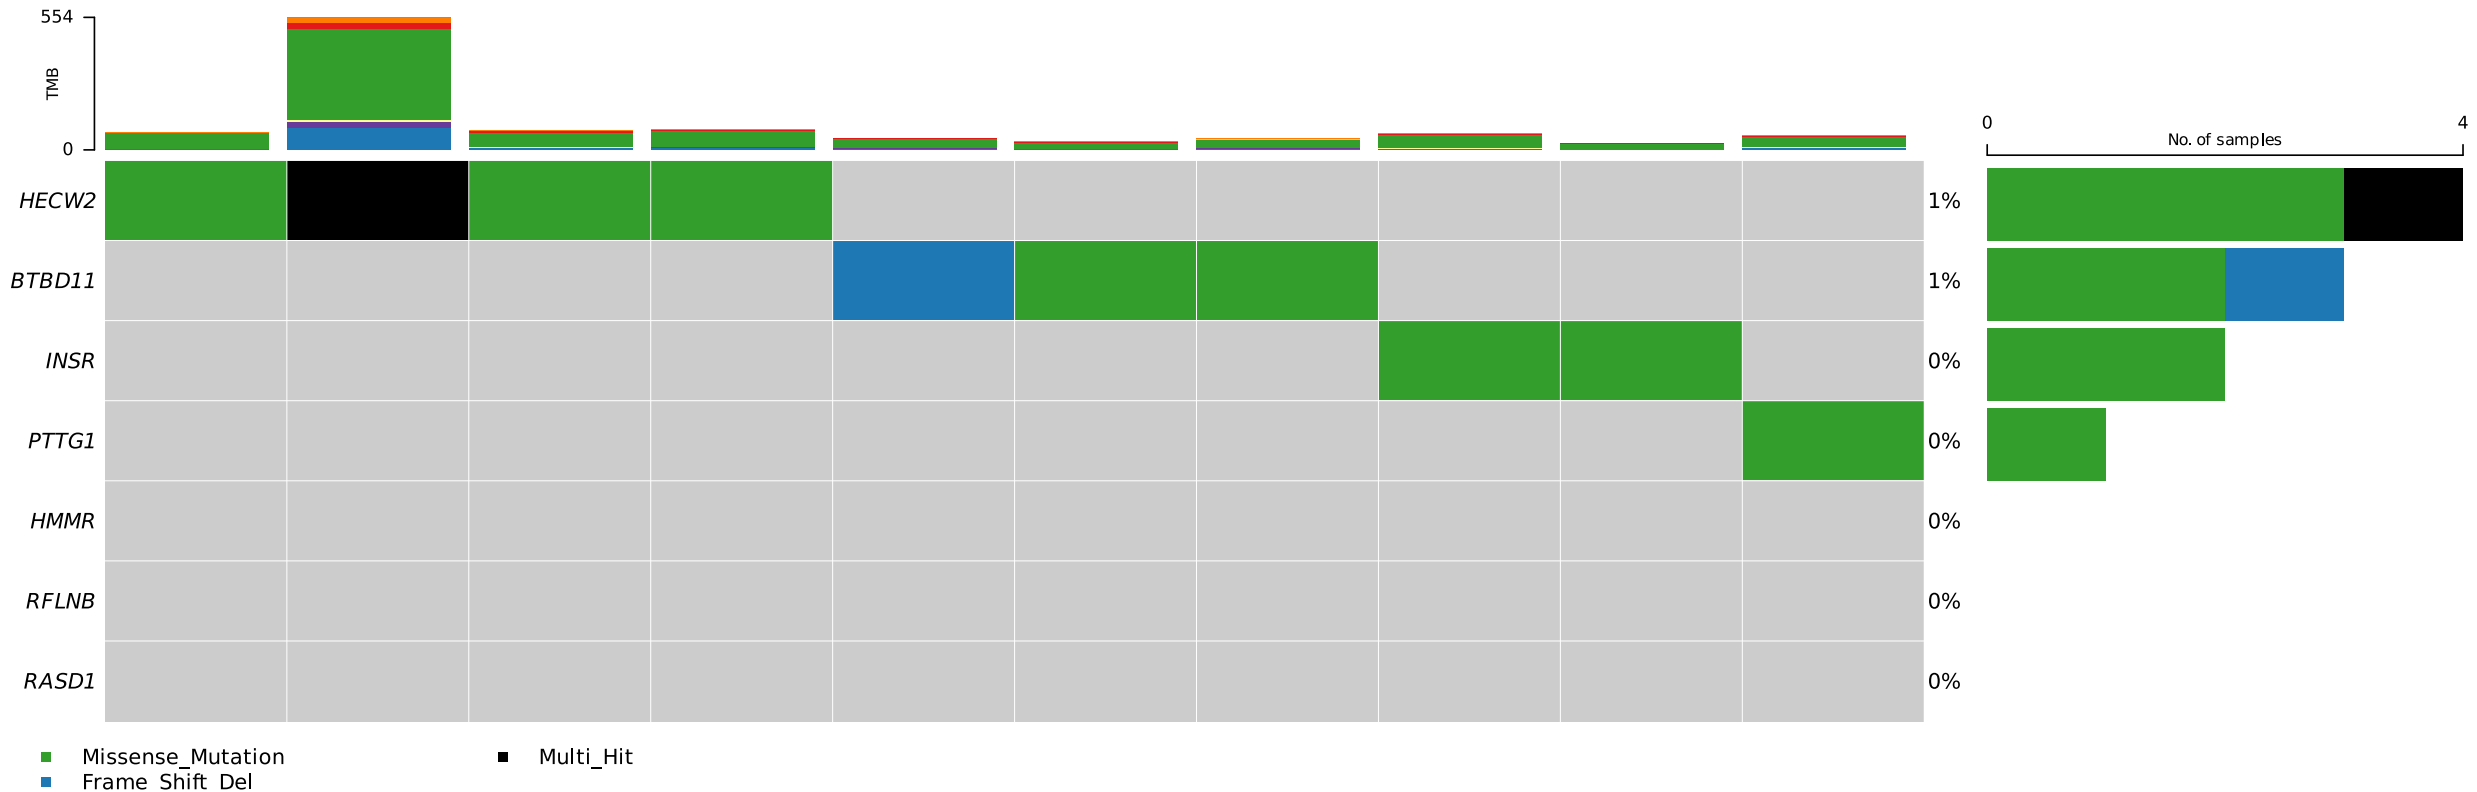

**Figure S6:** Oncoplot with the mutations recorded in the signature coding genes, The bar graph on the right represents the amount of mutated samples and the bar graph above represents the mutations registered on these samples
