# Supplementary material for: Machine Learning Gene Signature to Metastatic ccRCC Based on ceRNA Network
Source: MDPI journal article supplement (doi:10.3390/ijms25084214), 2024-04-11
Supplement: s1 [file s1]

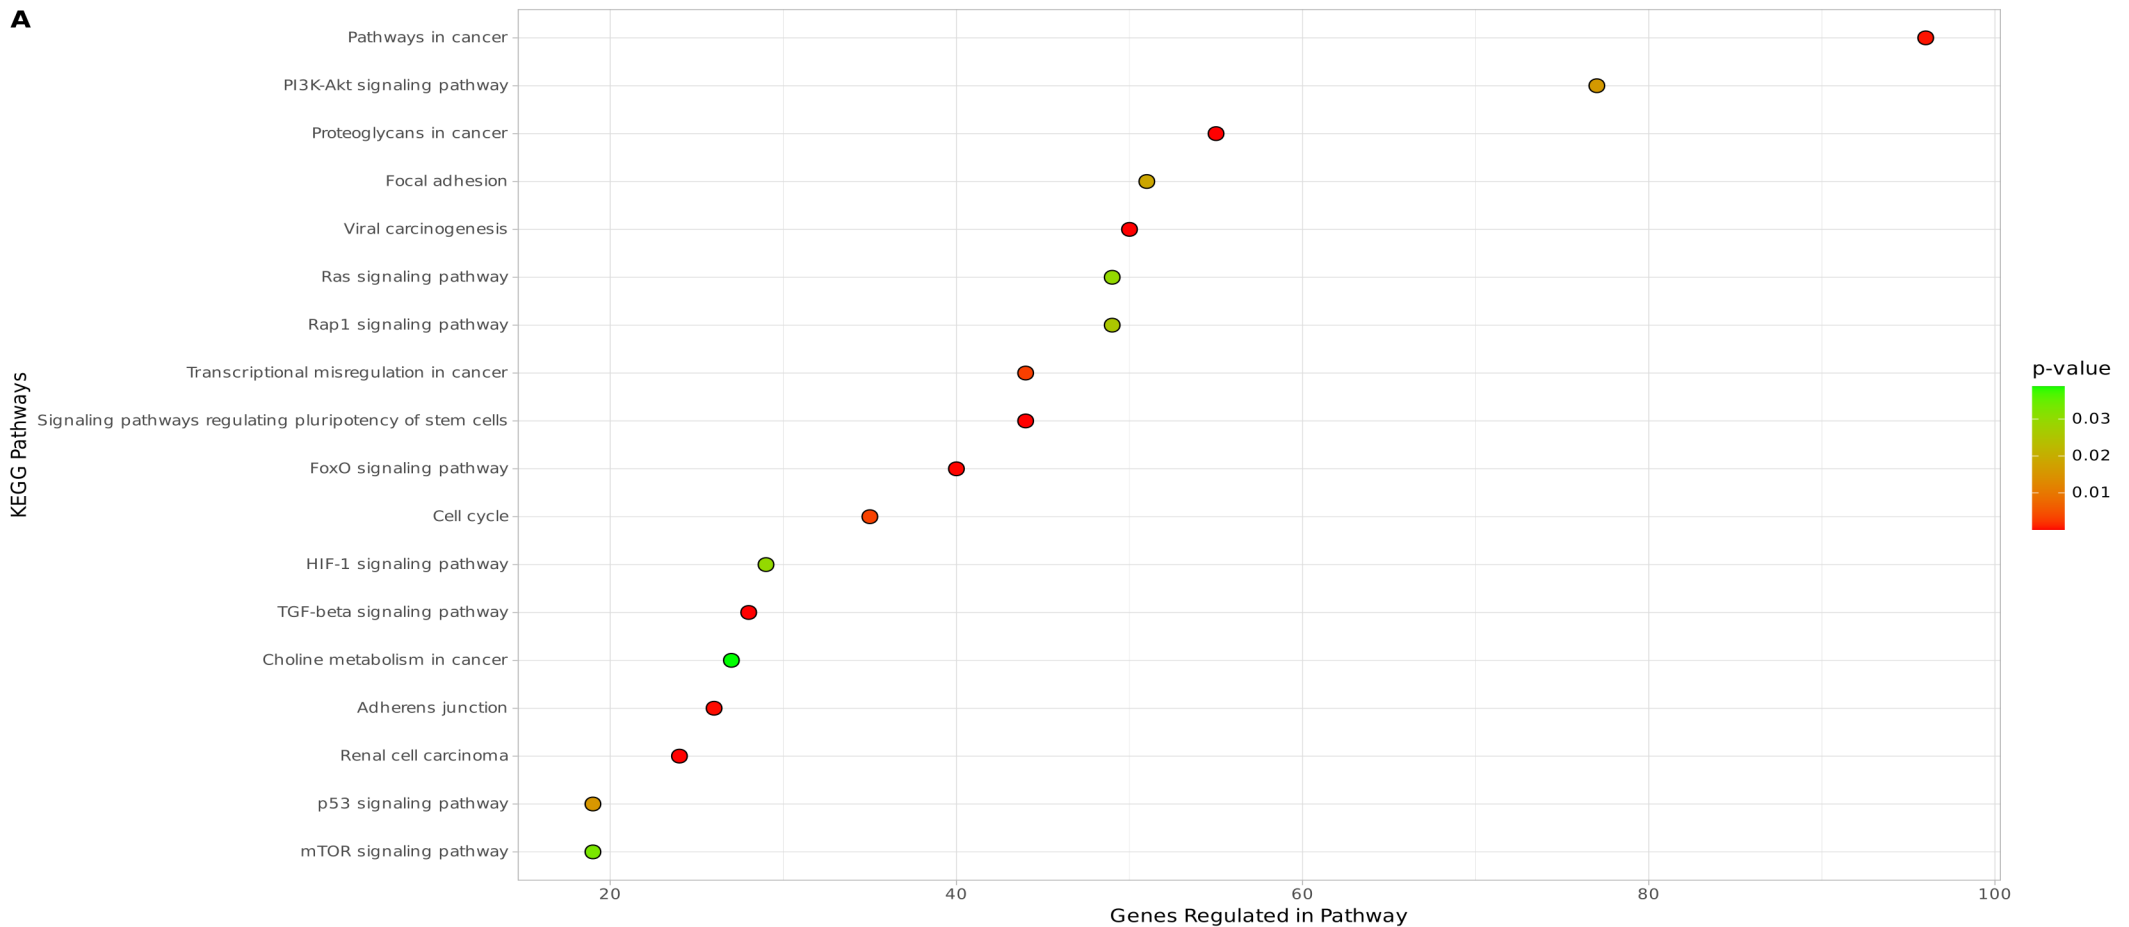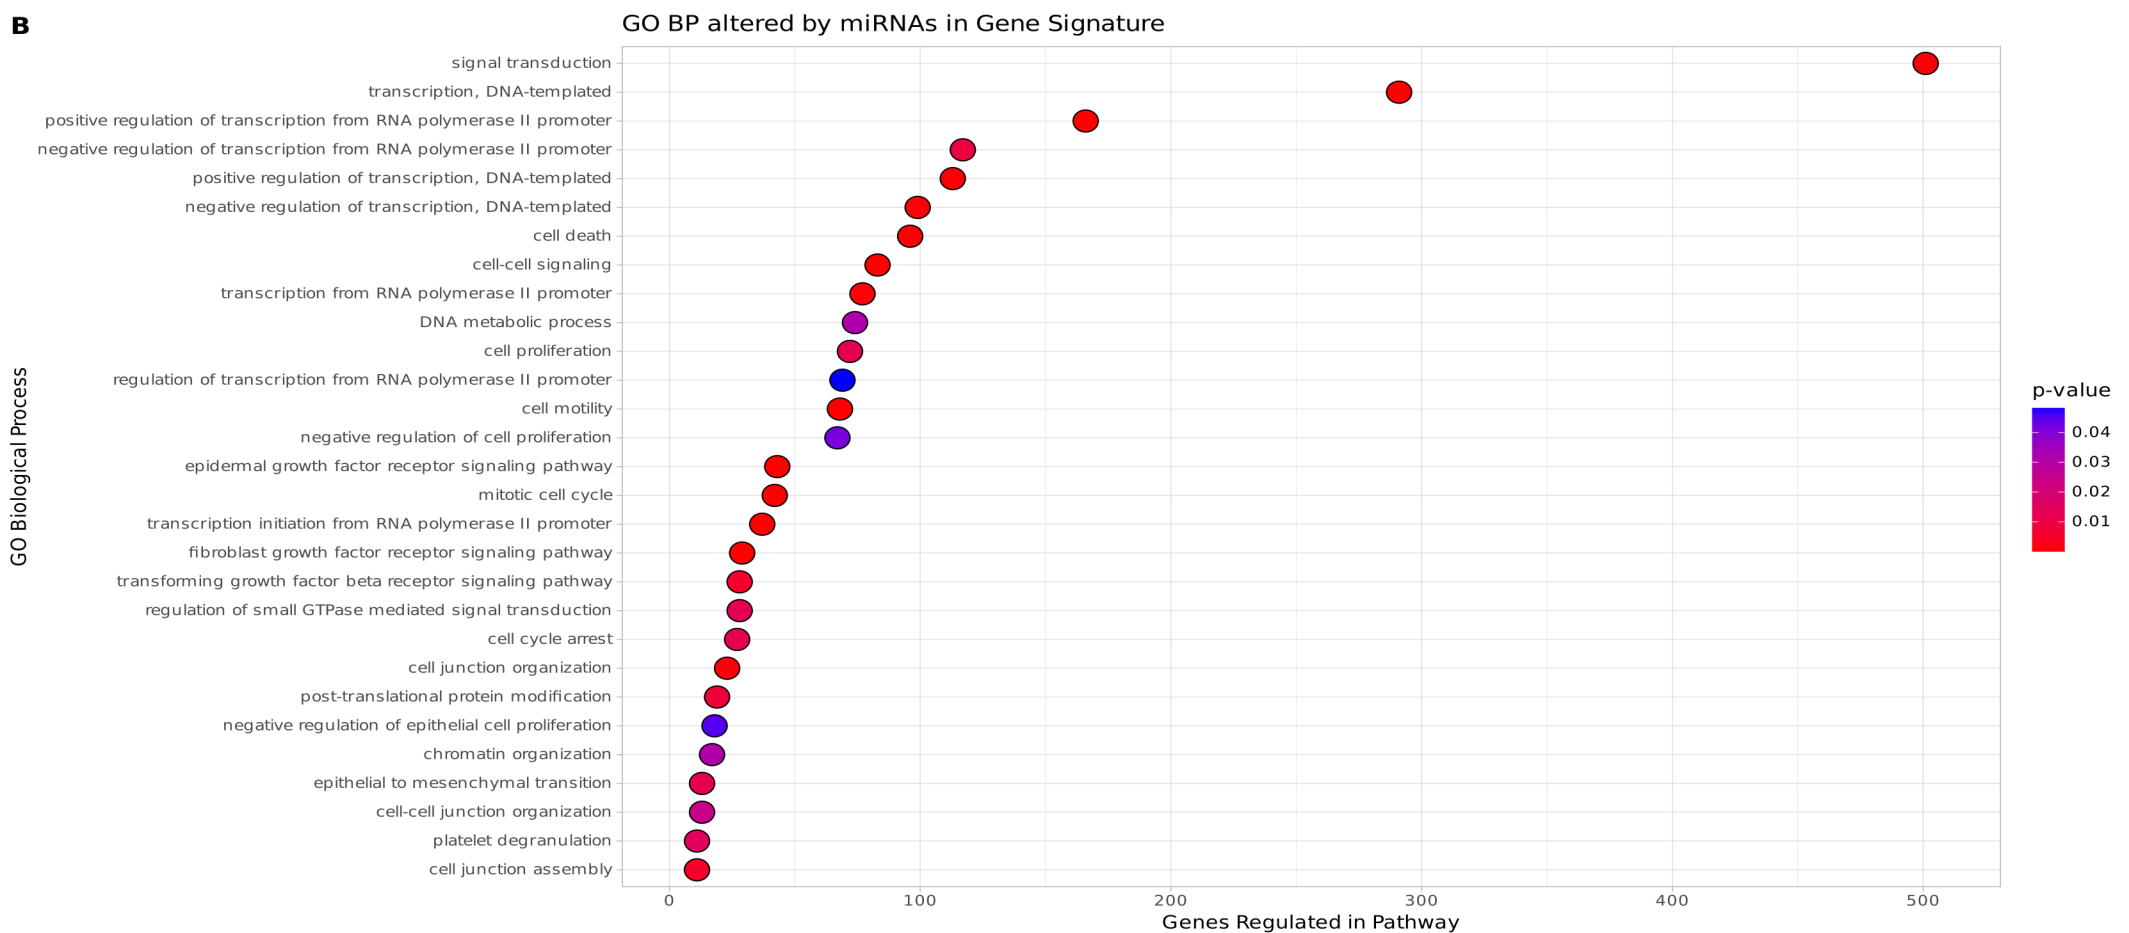

**Figure S8:** Functional annotation made from (a) KEGG and (b) Gene Ontology using the targets of miRNAs participating in the signature. In both, the Y axis represents the annotated pathways in the databases and the X axis represents the number of genes regulated by the miRNAs in the pathway.
