# Supplementary material for: Machine Learning Gene Signature to Metastatic ccRCC Based on ceRNA Network
Source: MDPI journal article supplement (doi:10.3390/ijms25084214), 2024-04-11
Supplement: s1 [file s1]

A

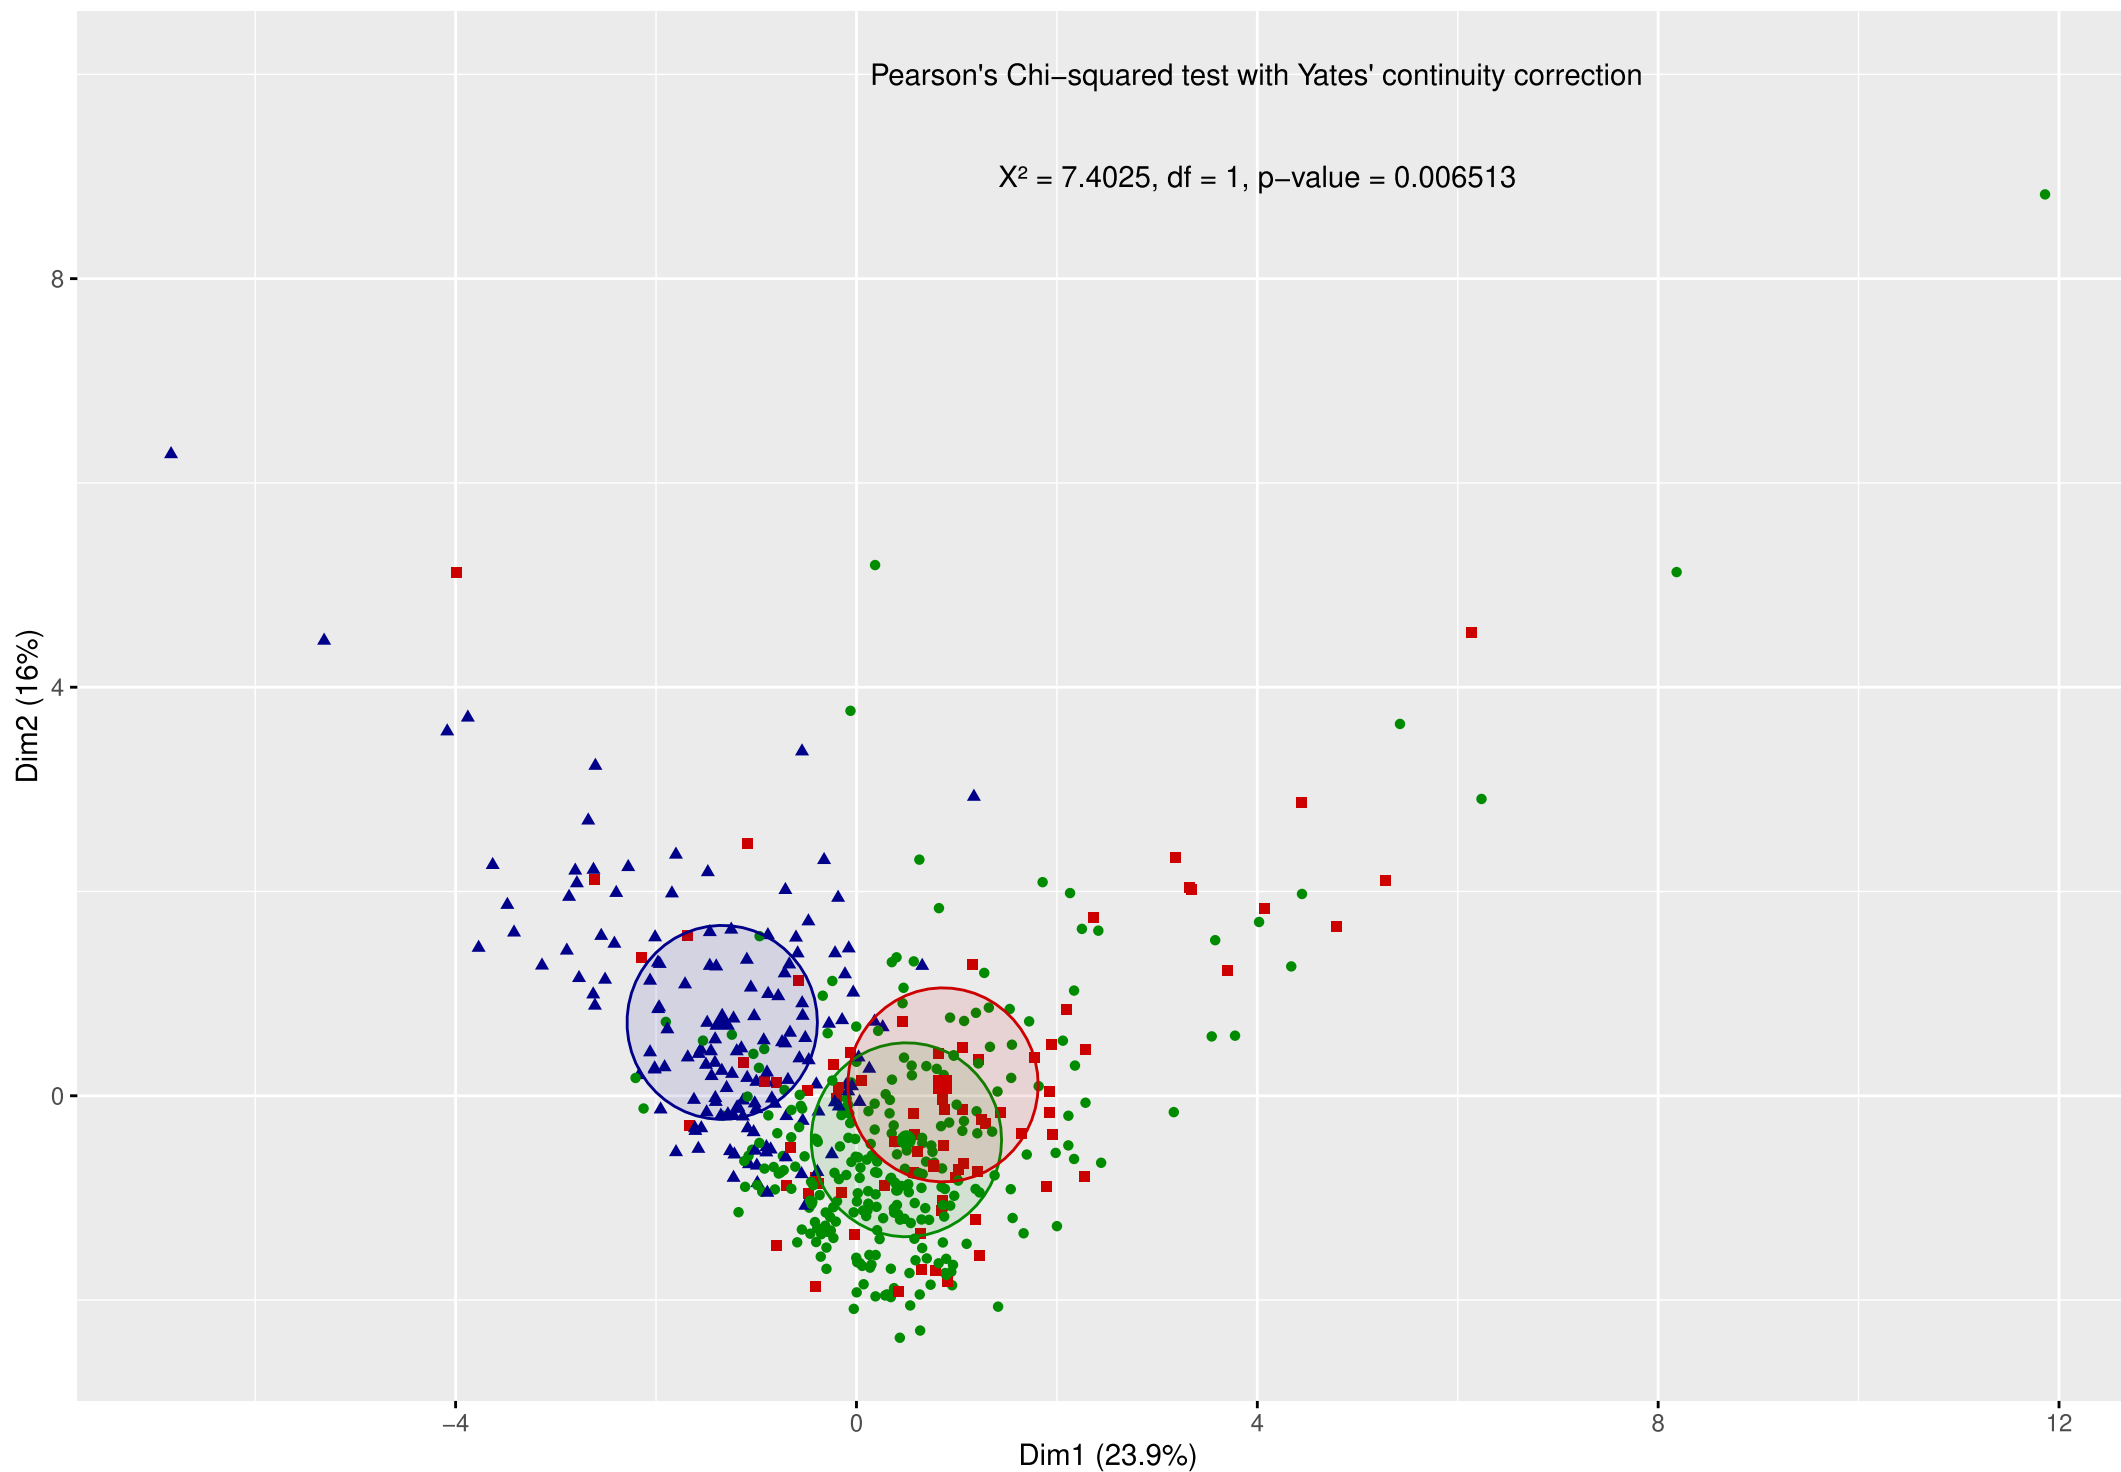

B Genes contributions on PCA

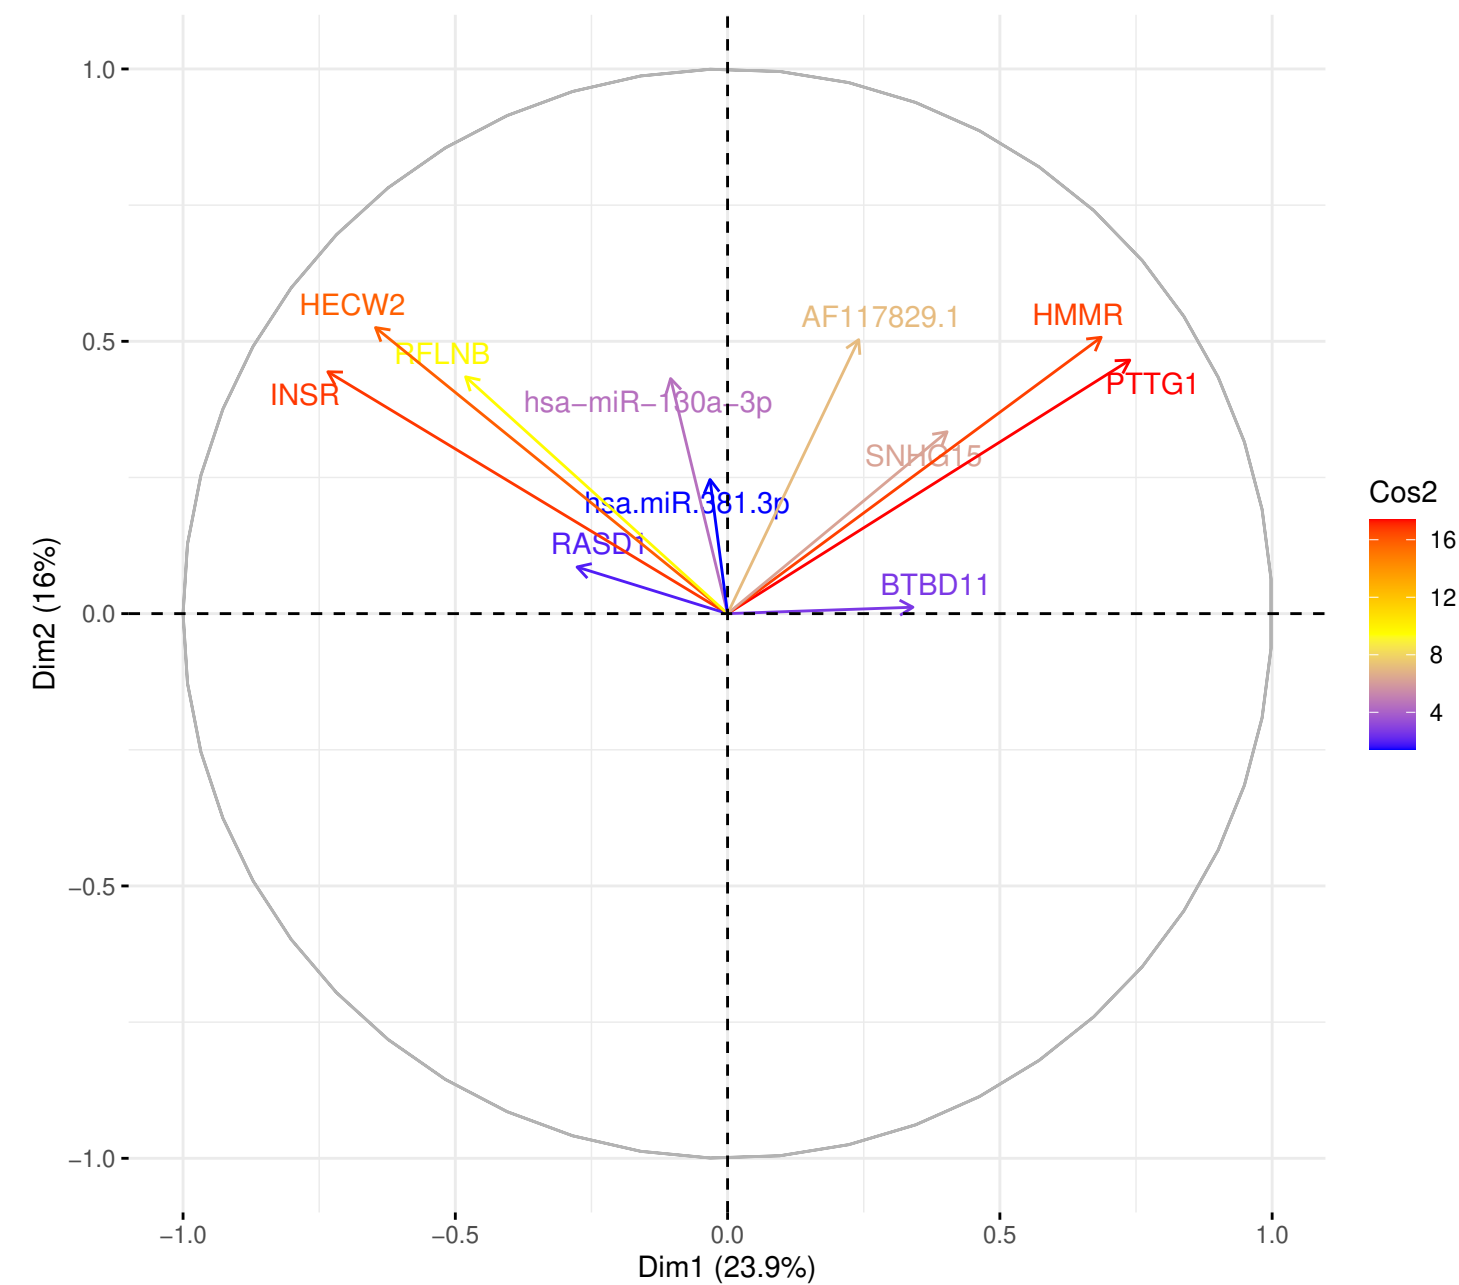

**Figure S5:** (A) K-means clustering over the TCGA-KIRC samples with the 11-signature genes into two groups (C1 and C2). Subsequently, the dimensional reduction using principal component analysis (PCA), grouped majority of metastatic samples (M1) within the C1 cluster. The chi-squared test revealed a significant association (p-value 0.007) between the metastatic samples and the clustering. (B) Correlation circle plot of gene contributions on PCA. Positively correlated genes are grouped on the positive values of the first and second dimensions (first quadrant), and negatively correlated genes are on the opposite quadrant. The genes with low, mid, and high Cos2 values are coloured in blue, yellow and red, respectively. A high Cos2 indicates a higher contribution to the specific dimension.
