# Supplementary material for: Machine Learning Gene Signature to Metastatic ccRCC Based on ceRNA Network
Source: Int J Mol Sci. 2024 Apr 11;25(8):4214. doi: 10.3390/ijms25084214 (PMC11049832; doi:10.3390/ijms25084214)
Supplement: Supplementary file 1 [file ijms-25-04214-s001.zip]

Archive with 9 entries (9 files):
- FigureS1_Volcanos.pdf
- FigureS2_ceRNA_Topology.pdf
- FigureS3_Multiway_Importance.pdf
- FigureS4_AUC.pdf
- FigureS5_Kmeans.pdf
- FigureS6_Oncoplot.pdf
- FigureS7_AalenReg.pdf
- FigureS8_miRNAsEnrichment.pdf
- Supplementary Tables.pdf
